# Supplementary material for: Primary cilium suppression by SREBP1c involves distortion of vesicular trafficking by PLA2G3
Source: PubMed Central journal article supplement — Mol Biol Cell. 2015 Jun 15;26(12):2321–32. doi: 10.1091/mbc.E14-10-1472 (PMC4462948; doi:10.1091/mbc.e14-10-1472), 2015-06-15
Supplement: supp_E14-10-1472v1_CombinedSupMats.pdf [file supp_E14-10-1472v1_CombinedSupMats.pdf]

# Supplemental Materials

*Molecular Biology of the Cell*

Gijs et al.

**Figure S1**

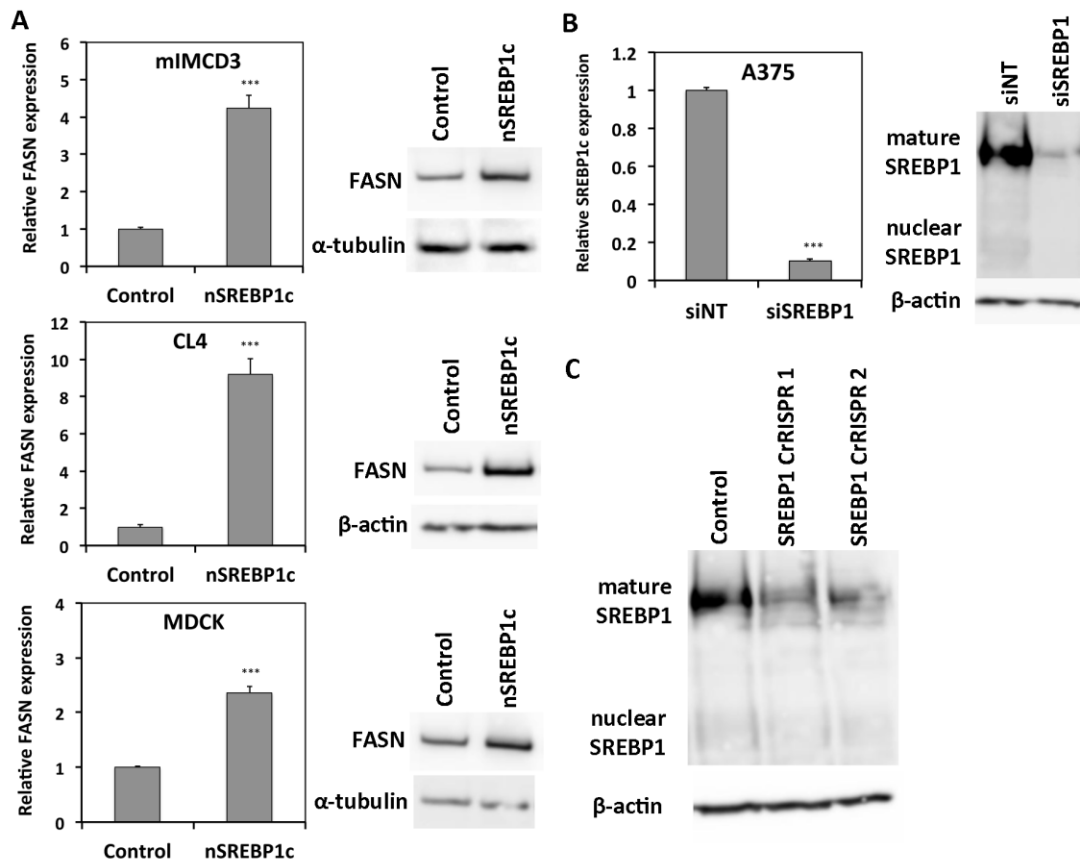

**Figure S1:** Modulation of SREBP1c expression.

**A.** Efficient upregulation of FASN upon SREBP1c transduction. QRT-PCR (left panel) and western blot (right panel) analysis of FASN in mIMCD3, CL4 and MDCK cells after infection with adenovirus encoding nSREBP1c versus control vector. **B.** Efficient siRNA-mediated knockdown of SREBP1. QRT-PCR (left panel) and western blot (right panel) analysis of SREBP1 in A375 cells after transfection with SREBP1-targeting siRNA (siSREBP1) or non-targeting siRNA (siNT). **C.** Efficient CRISPR/Cas9-mediated knockdown of SREBP1. Western blot analysis of SREBP1 in A375 cells transfected with SREBP1-targeting CRISPR/Cas9 plasmids or in control cells.

Error bars, SEM; \*\*\* is P-value < 0.0005 using student's t-test.  $\alpha$ -tubulin or  $\beta$ -actin is used as loading control for western blotting.

## Figure S2

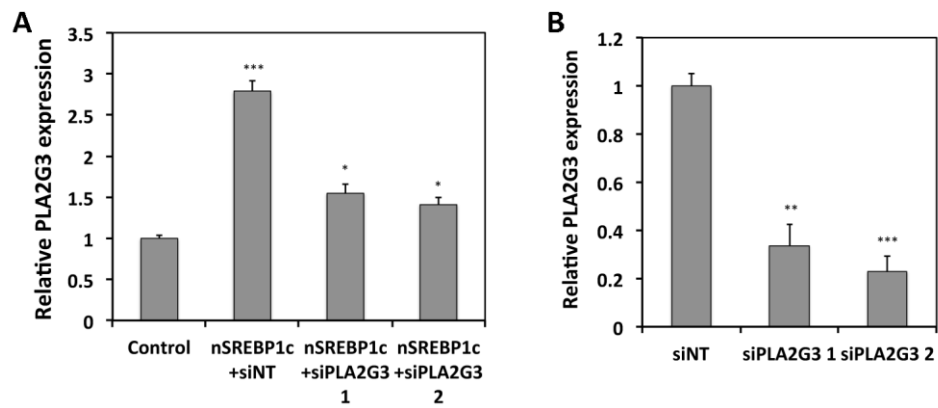

**Figure S2:** Modulation of PLA2G3 expression.

**A.** Efficient attenuation of PLA2G3 in nSREBP1c-transduced cells. QRT-PCR analysis of mIMCD3 cells 48h after transfection with nSREBP1c or control adenovirus in combination with siRNAs targeting PLA2G3 (siPLA2G3) or non-targeting siRNA (siNT). **B.** Efficient knockdown of PLA2G3. QRT-PCR analysis of A375 cells 48h after transfection with siPLA2G3s or siNT.

N = 3; Error bars, SEM; \* is P-value < 0.05, \*\* is P-value < 0.005 and \*\*\* is P-value < 0.0005 using student's t-test.

## Figure S3

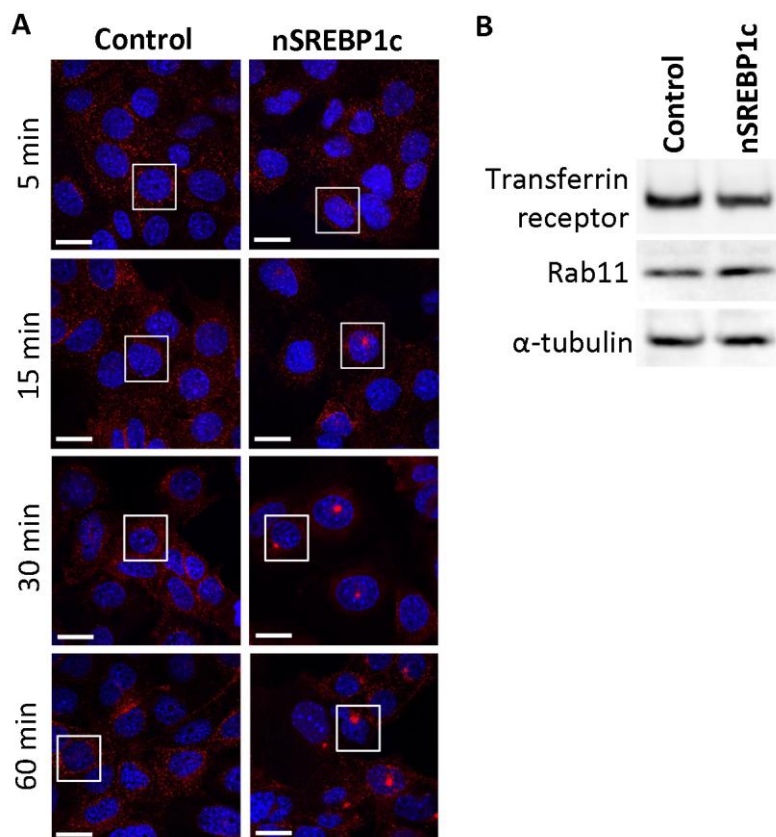

**Figure S3:** SREBP1c impairs vesicle recycling, but not transferrin receptor or Rab11 expression.

**A.** SREBP1c-overexpressing cells accumulate transferrin in a perinuclear region. mIMCD3 cells were infected with nSREBP1c or control adenovirus. Cells were fixed after 5, 15, 30 and 60 min of Alexa-Fluor 564 conjugated transferrin uptake (red) and stained with DAPI (blue) (N = 3; Bar, 20  $\mu$ M). White square: representative regions shown in Figure 5A. **B.** nSREBP1c has no effect on transferrin receptor and rab11 expression. Western blot analysis of transferrin receptor, rab11 and  $\alpha$ -tubulin in mIMCD3 cells 72h after infection with nSREBP1c or control adenovirus.

**Figure S4**

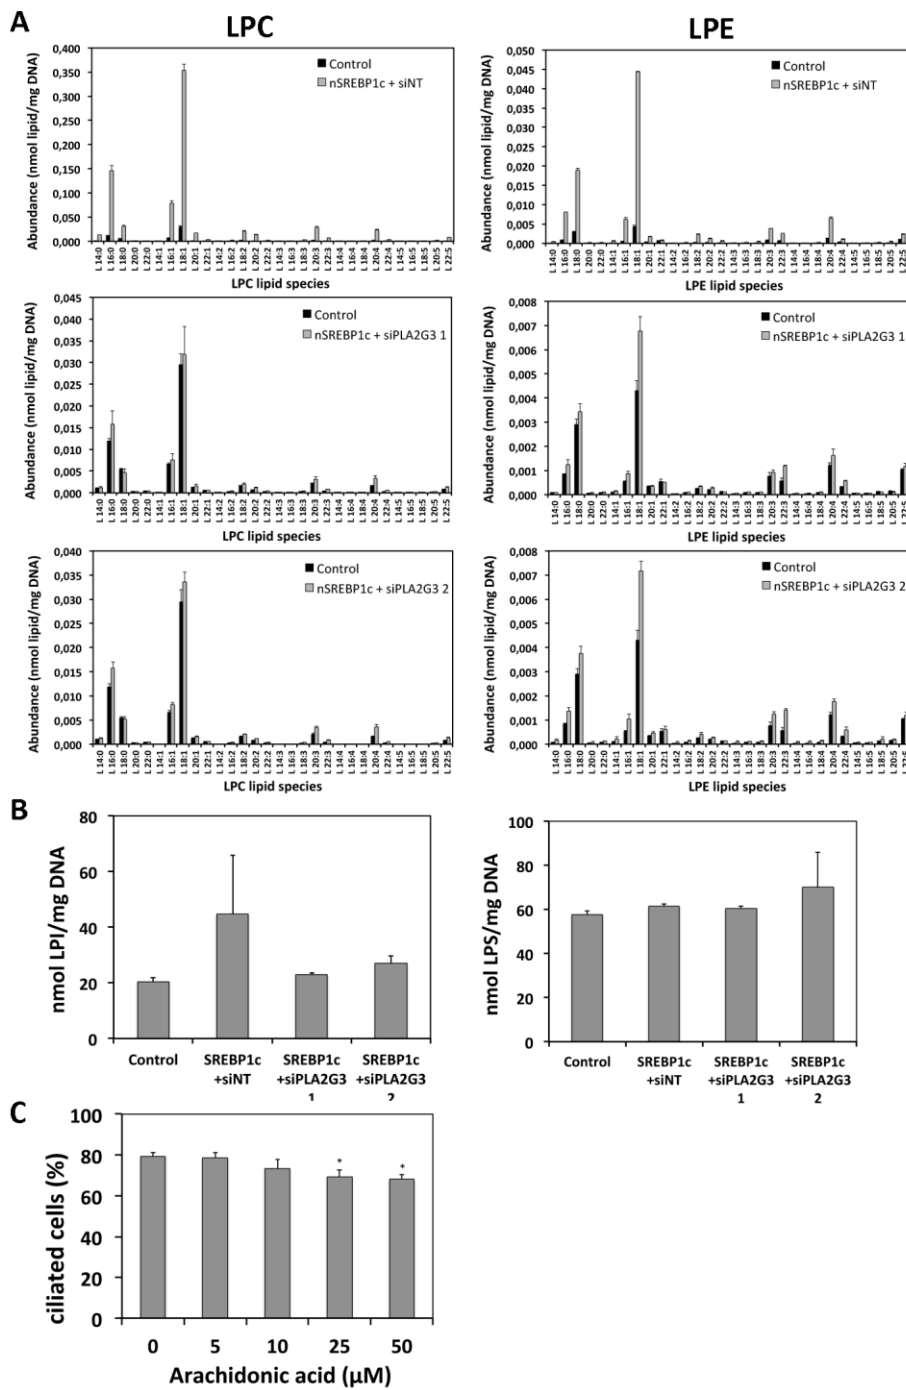

**Fig. S4:** Lysophospholipid analysis and effect of arachidonic acid treatment on ciliogenesis.

**A, B.** Effect of nSREBP1c-induced PLA2G3 expression on lysophospholipid levels. mIMCD3 cells were infected with control or nSREBP1c adenovirus in combination with PLA2G3 targeting siRNA (siPLA2G3) or non-targeting siRNA (siNT). Lysophospholipids (**A:** LPC, LPE and **B:** LPI, LPS) were measured by ESI-MS/MS after 72h. **C.** Minor effects of arachidonic acid treatment on ciliogenesis. mIMCD3 cells were treated with different concentrations of arachidonic acid during 72h and were stained for acetylated  $\alpha$ -tubulin and DAPI. For

quantification, 650 – 750 cells were scored (Error bars, SEM; \* is P-value < 0.05 and \*\* is P-value < 0.005 using student's t-test).

**Table S1**

| siRNA                    | sequence                                      |
|--------------------------|-----------------------------------------------|
| mouse PLA2G3 siRNA 1     | CGAAACUACCGAUUCCACA                           |
| mouse PLA2G3 siRNA 2     | GCACCAGCGAGAGAAGAGA                           |
| human PLA2G3 siRNA 1     | GACACCAGCUCCAGGAUAA                           |
| human PLA2G3 siRNA 2     | GGACUGGCCUUAUCCAUGA                           |
| human SREBP1 siRNA       | CGGAGAAGCUGCCUAUCAUU                          |
| primer                   | sequence                                      |
| mouse FASN Fw            | AGAGATCCCGAGACGCTTCT                          |
| mouse FASN Rev           | AGCCGGTTGGCCATCATT                            |
| mouse CDKN2B Fw          | CGCCCAATCCAGGTCATGAT                          |
| mouse CDKN2B Rev         | AGTTGGGTTCTGCTCCGTG                           |
| mouse MX2 Fw             | CGAGAATTGCCAGGGTTTGT                          |
| mouse MX2 Rev            | GGCAGCTCGTACAATTTCACT                         |
| mouse PLA2G3 Fw          | GGCTGAGGCCACCTCATATACTTC                      |
| mouse PLA2G3 Rev         | TCCTTTGCCCTCAGCACAGTCAAG                      |
| Pig FASN Fw              | TTGTGGACGGAGGCATCAAC                          |
| Pig FASN Rev             | GCATCAGAACTGCTCACACC                          |
| pig CDKN2B Fw            | GGAGACCGTGCGTCAACTTC                          |
| pig CDKN2B Rev           | CTGCCATCATCATGACCTGGAT                        |
| pig MX2 Fw               | GGAAATACGCAAAGCCCAGG                          |
| pig MX2 Rev              | TGATGCCGGGAAGATCGATG                          |
| Pig PLA2G3 Fw            | AGCCTTCTCAACGTGCTGG                           |
| Pig PLA2G3 Rev           | CATACCTTACACCCGCC                             |
| dog FASN Fw              | CACGATGATCCCCTGCTC                            |
| dog FASN Rev             | GTGCATCCTGAGACTGGTCA                          |
| dog CDKN2B Fw            | CTTCTGGACACGCTGGT                             |
| dog CDKN2B Rev           | CTCCTCAGCCAGGTCCAC                            |
| dog MX2 Fw               | ATCGGAGTGCAGATCAAGGC                          |
| dog MX2 Rev              | AATGTCCACGTTGCAGGG                            |
| dog PLA2G3 Fw            | GGCCTCCATCAAACCTGATA                          |
| dog PLA2G3 Rev           | CCGATCTGCTGTTCACTG                            |
| human SREBP1c Fw         | GCCATGGATTGCACTTT                             |
| human SREBP1c Rev        | CAAGAGAGGAGCTCAATG                            |
| human PLA2G3 Fw          | TCCACTGGACTGTGTGGAAG                          |
| human PLA2G3 Rev         | GTGCCTTTATCCTGGAGCTG                          |
| 18S Fw                   | CGCCGCTAGAGGTGAAATTC                          |
| 18S Rev                  | TTGGCAAATGCTTTCGCTC                           |
| PLA2G3 deletion SRE1 Fw  | TACAAGCCCAAGATACTCCAGCCTCTTCTCCTCCTCCCGCAGC   |
| PLA2G3 deletion SRE1 Rev | GCTGCGGGAGGAGGAGGAAAGAGGCTGGAGTATCTTGGGCTTGTA |
| PLA2G3 mutation SRE1 Fw  | CGGTTACAAGCCCAAGATCACCGATTACTCCAGCCTCTTTCC    |
| PLA2G3 mutation SRE1 Rev | GGAAAGAGGCTGGAGTAATCGGTTGATCTTGGGCTTGTAACCG   |
| dog PLA2G3 ChIP Fw       | TGCCTCATCATGCCAGCGA                           |
| dog PLA2G3 ChIP Rev      | GCTCATGCCCCAAATAAACTCCAA                      |
| dog FASN ChIP Fw         | ACCCTGACGCGACTGAACTC                          |
| dog FASN ChIP Rev        | CATAGGTGGGGATGCTGAGC                          |
| mouse PLA2G3 ChIP Fw     | TGCATCCCTCAGCCAATCAG                          |
| mouse PLA2G3 ChIP Rev    | GGGTGTCAGGGCCAATGAAT                          |
| mouse FASN ChIP Fw       | GTGGCAAAGGTACGTACGTGT                         |
| mouse FASN ChIP Rev      | CCCTATAGTGGCAAACAGGTCA                        |

**Table S1:** Nucleotide sequences of oligonucleotides and siRNAs used in this study.
